# Supplementary material for: Prevalence of Fasciola gigantica infection in slaughtered animals in south-eastern Lake Chad area in relation to husbandry practices and seasonal water levels
Source: PubMed Central journal article supplement (PMC4022263; doi:10.1186/1746-6148-10-81), 2014-04-04

Lake Chad

0 10 20 30 km

-  Slaughterslabs
-  Water bodies in April 2011
-  Water bodies in November 2011

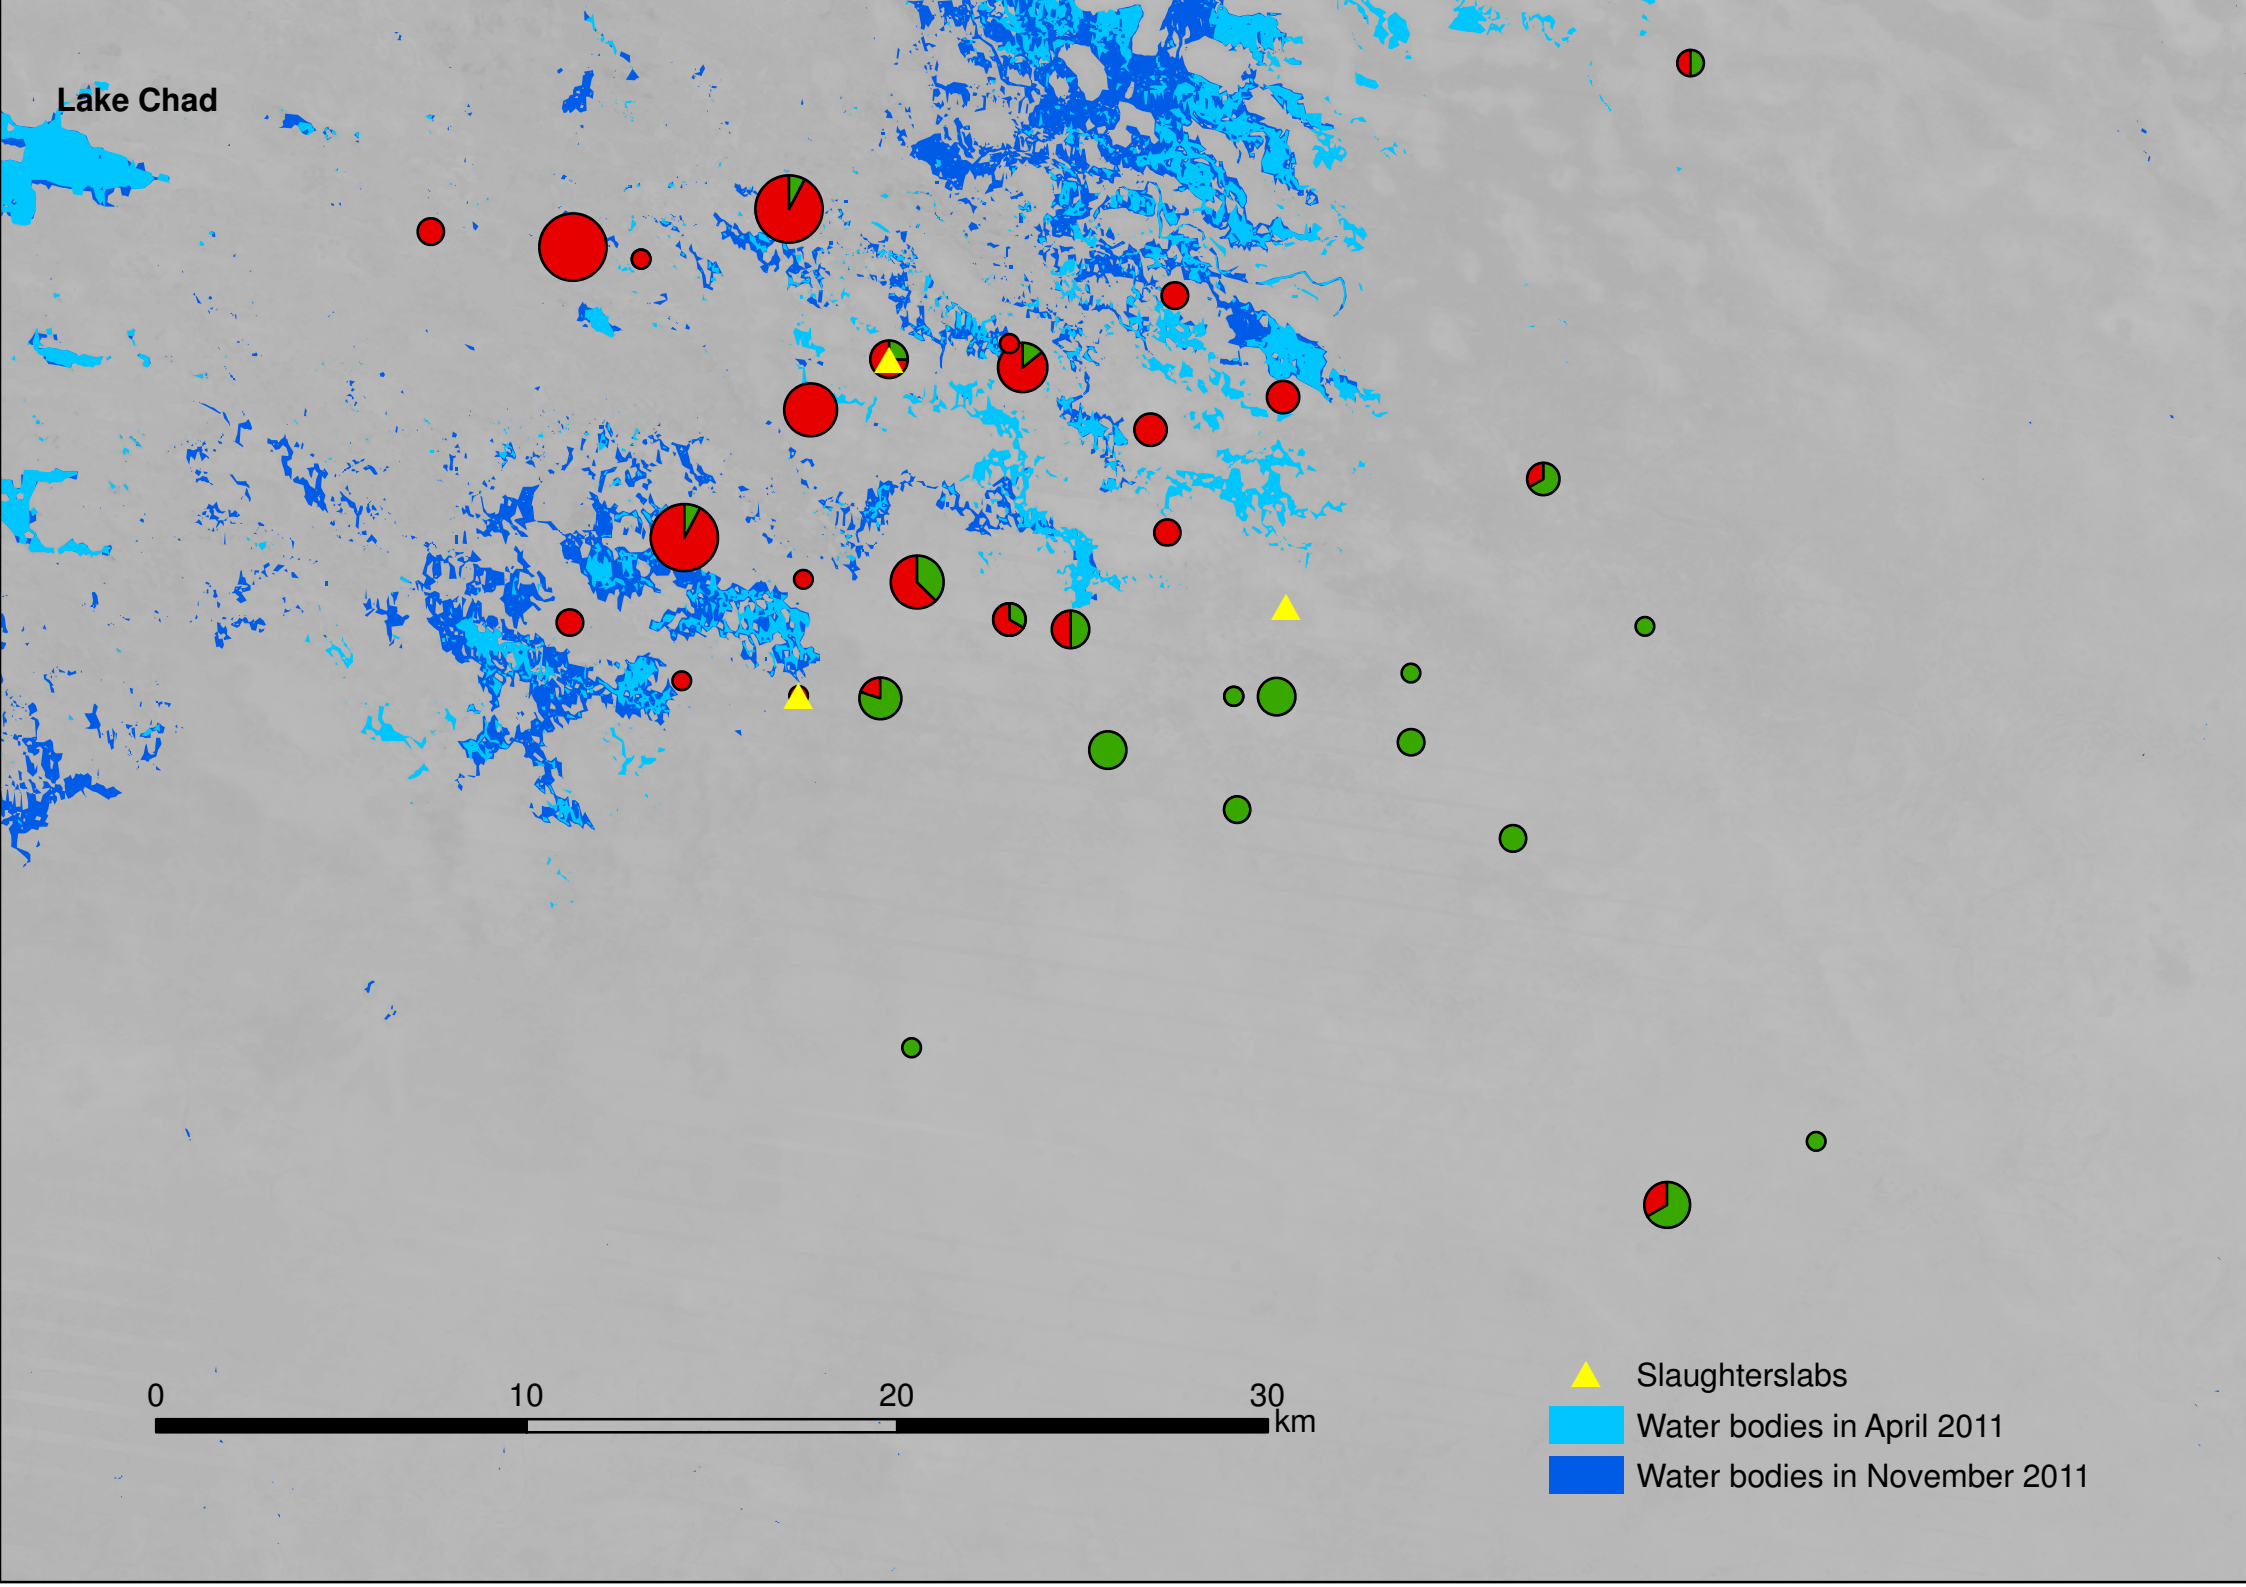

Supplement: 1746-6148-10-81-S1.pdf [file 1746-6148-10-81-S1.pdf]
